# Supplementary material for: Chiral zirconia nanotubes prepared through a sol–gel transcription approach
Source: Royal Society of Chemistry journal article supplement (doi:10.1039/c3ta13447d), 2013-10-18
Supplement: c3ta13447d.pdf [file c3ta13447d.pdf]

## Chiral zirconia nanotubes prepared through a sol-gel transcription approach

Hongjing Huo, Sibing Wang, Shuwei Lin, Yi Li, Baozong Li and Yonggang Yang\*

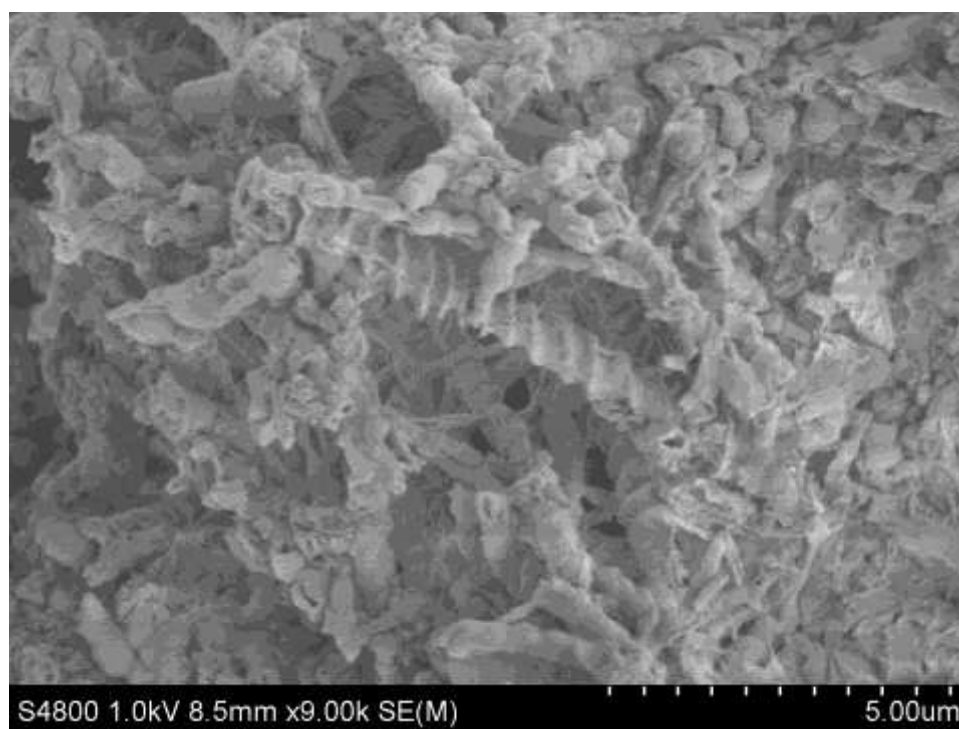

**Fig. S1** FE-SEM images of the right-handed helical  $\text{ZrO}_2$  nanotubes prepared using LL-12Val5PyClO<sub>4</sub> and 120  $\mu\text{L}$  of tetrapropyl zirconate.

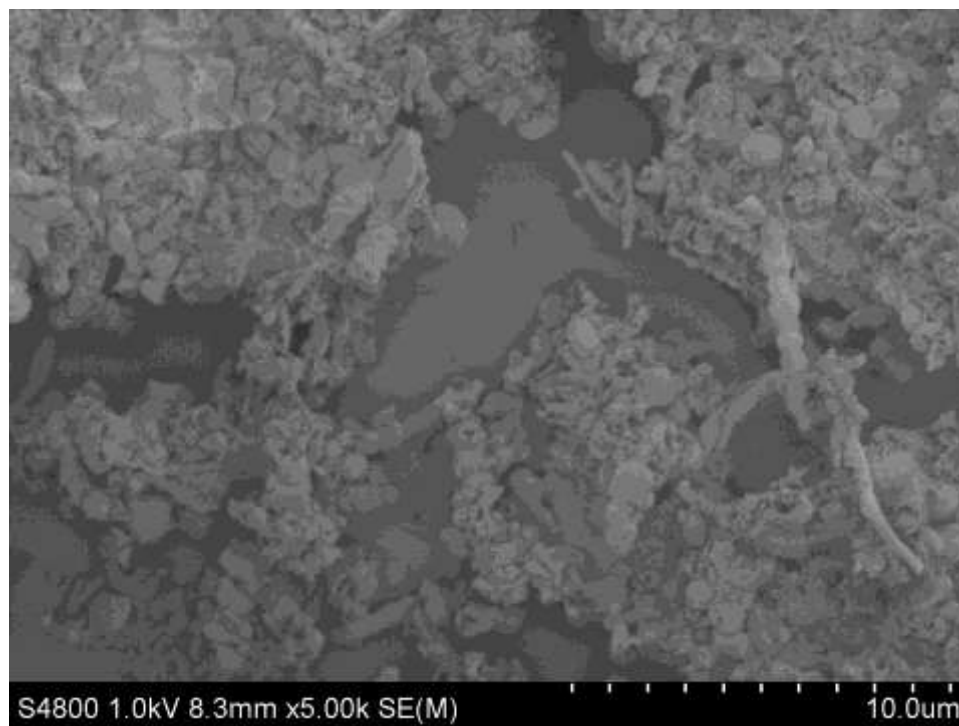

**Fig. S2** FE-SEM images of the right-handed helical ZrO<sub>2</sub> nanotubes prepared using LL-12Val5PyClO<sub>4</sub> and 150 μL of tetrapropyl zirconate.
